# Supplementary material for: Reduction of N2 to NH3 catalyzed by a Keggin-type polyoxometalate-supported dual-atom catalyst
Source: Royal Society of Chemistry journal article supplement (doi:10.1039/d1qi00752a), 2021-11-22
Supplement: d1qi00752a1.pdf [file d1qi00752a1.pdf]

## Supporting Information

# Reduction of N<sub>2</sub> to NH<sub>3</sub> Catalyzed by A Keggin-Type Polyoxometalate-Supported Dual-Atom Catalyst

Yu Wang<sup>‡, §</sup>, Rui-Cheng Qin<sup>†</sup>, Dan Wang<sup>†</sup>, and Chun-Guang Liu<sup>†\*</sup>

*†Department of Chemistry, Faculty of Science, Beihua University, Jilin City,  
132013, P. R. China.*

*‡ State Key Lab of Urban Water Resource and Environment, School of Science,  
Harbin Institute of Technology Shenzhen, Shenzhen 518055, PR China.*

*§ College of Chemical Engineering, Northeast Electric Power University, Jilin  
City, 132012, P. R. China*

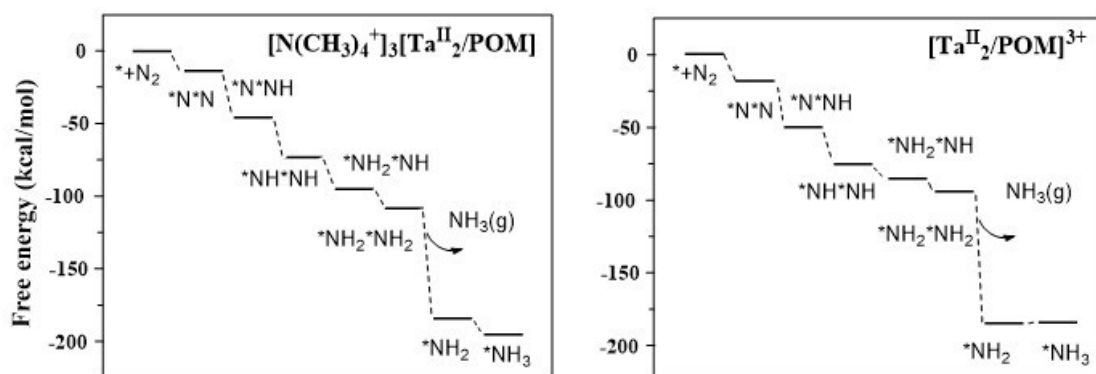

**Figure S1.** Free energy diagram for enzymatic pathway on  $[\text{N}(\text{CH}_3)_4^+]_3[\text{Ta}^{\text{II}}_2/\text{POM}]$  and  $[\text{Ta}^{\text{II}}_2/\text{POM}]^{3+}$ .

## XYZ coordinates

$[\text{N}(\text{CH}_3)_4^+]_3[\text{Ta}^{\text{II}}_2/\text{POM}]$  (POM =  $[\text{PW}_{11}\text{O}_{39}]^{7-}$ )

| Atomic | Coordinates (Angstroms) |             |             |
|--------|-------------------------|-------------|-------------|
|        | X                       | Y           | Z           |
| O      | -1.06143900             | -0.75513700 | 0.96631700  |
| O      | -0.90869100             | 0.62166900  | -1.13942900 |
| O      | 0.61103100              | -1.42328300 | -0.77722000 |
| O      | 2.89093100              | -2.63287700 | -1.29540400 |
| W      | 2.19394500              | -1.32124500 | -2.64748900 |
| O      | 3.02599500              | 0.00149100  | -1.56344700 |
| W      | 2.88341900              | 1.75686400  | -0.66095400 |
| O      | 1.56189200              | 2.14221600  | -2.00240200 |
| W      | 0.12437400              | 1.71468900  | -3.17917300 |
| O      | 1.04612900              | -0.02778100 | -3.35151500 |
| O      | 0.99882600              | 0.72326500  | 0.49075500  |
| O      | -1.48624800             | 0.69343600  | -3.68347100 |
| W      | -2.71568900             | -0.13888400 | -2.52169300 |
| O      | -3.21888500             | 1.51966000  | -1.76984100 |
| W      | -2.06819400             | 2.75351500  | -0.70352900 |
| O      | -1.01922900             | 2.95383000  | -2.31895600 |
| O      | -1.64467100             | -1.77226100 | -2.61340600 |
| W      | -0.62143000             | -3.21646000 | -1.93510200 |
| O      | 0.68096300              | -4.01969900 | -0.71944700 |
| O      | -1.20185100             | -4.56300400 | -2.79235300 |
| O      | -1.89835300             | -3.15127900 | -0.42910000 |

|   |             |             |             |
|---|-------------|-------------|-------------|
| W | -3.13715800 | -2.19095700 | 0.60861300  |
| O | -2.27991200 | -2.78417500 | 2.22255100  |
| O | 2.00734700  | -0.89340200 | 3.81699200  |
| W | 3.10728100  | -0.25090700 | 2.36049300  |
| O | 3.63488500  | 0.82906100  | 0.90231900  |
| O | 0.88161900  | -2.69898900 | -2.99932900 |
| O | -4.05404500 | -0.47004800 | -3.53606400 |
| O | -3.36046200 | -1.00125600 | -0.84770800 |
| O | -4.60333500 | -3.07563500 | 0.56156900  |
| O | -3.66169700 | -0.62827000 | 1.77562700  |
| W | -2.62430200 | 0.78159400  | 2.42999500  |
| O | -1.61187000 | -0.47528100 | 3.63786900  |
| O | -3.63966800 | 1.58665300  | 3.53682500  |
| O | -2.76560900 | 1.79963000  | 0.89632200  |
| O | -0.70826800 | 1.53151400  | 2.72359500  |
| W | 0.69405200  | 2.67776700  | 1.76369500  |
| O | 1.74604600  | 1.28222500  | 2.87110600  |
| O | 0.80048400  | -3.07835000 | 1.75525600  |
| O | -2.94033800 | 4.22266800  | -0.68311100 |
| O | -0.59312800 | 3.13356400  | 0.43938800  |
| O | 0.54390300  | 2.53914200  | -4.60762000 |
| O | 3.36184100  | -1.55755800 | -3.87408000 |
| O | 2.99247100  | -1.79673000 | 1.31686000  |
| O | 0.76651200  | 4.11202300  | 2.69491200  |
| O | 2.17021000  | 3.01093700  | 0.56924800  |
| O | 4.27908700  | 2.56224800  | -1.24875000 |
| O | 4.60781300  | -0.30948100 | 3.17411000  |
| O | 3.04670700  | -4.58798900 | 0.70846900  |
| W | 2.09757000  | -3.24428500 | 0.27819300  |
| N | -7.02478600 | -0.11864300 | -0.43813000 |
| N | 0.92372600  | 6.52462400  | -0.62148100 |
| N | 6.75074100  | -0.69924300 | -1.09344800 |
| C | -6.60256700 | -1.14500900 | -1.46578100 |
| H | -7.41347600 | -1.86702600 | -1.57967300 |
| H | -6.39548300 | -0.63818600 | -2.40870600 |
| H | -5.69905300 | -1.64112200 | -1.11672600 |
| C | -7.19463100 | -0.78761100 | 0.90160600  |
| H | -7.51595900 | -0.03713300 | 1.62617500  |
| H | -7.94790500 | -1.57188800 | 0.80738800  |
| H | -6.24097700 | -1.21915900 | 1.20408300  |
| C | -5.96968000 | 0.95873200  | -0.32674600 |
| H | -5.84318800 | 1.43082900  | -1.30056900 |
| H | -6.30076800 | 1.68634400  | 0.41664500  |
| H | -5.02886700 | 0.50456700  | -0.02402400 |

|    |             |             |             |
|----|-------------|-------------|-------------|
| C  | -8.32254600 | 0.50123000  | -0.86232100 |
| H  | -9.08653300 | -0.27608600 | -0.92312400 |
| H  | -8.61297400 | 1.25497300  | -0.12819000 |
| H  | -8.18507400 | 0.96688400  | -1.83953200 |
| C  | -0.30145800 | 6.42173200  | 0.25728700  |
| H  | -0.23862400 | 5.50934200  | 0.84740800  |
| H  | -0.32621200 | 7.29474300  | 0.91220000  |
| H  | -1.18814900 | 6.38680300  | -0.37683200 |
| C  | 0.90461200  | 7.83733000  | -1.34648700 |
| H  | 0.92882000  | 8.64859600  | -0.61645100 |
| H  | 1.77718000  | 7.89458600  | -1.99952100 |
| H  | -0.00848100 | 7.89670100  | -1.94115800 |
| C  | 2.16463400  | 6.42943400  | 0.23041400  |
| H  | 2.19632200  | 5.44534000  | 0.69907000  |
| H  | 3.03603700  | 6.56254100  | -0.41337100 |
| H  | 2.12832500  | 7.21442900  | 0.98789600  |
| C  | 0.92611700  | 5.39732000  | -1.62882400 |
| H  | 1.81762100  | 5.49173500  | -2.25121500 |
| H  | 0.94125200  | 4.44855700  | -1.09831800 |
| H  | 0.02408000  | 5.46443600  | -2.23693800 |
| C  | 6.21716600  | -0.17167100 | -2.40497700 |
| H  | 6.95251100  | 0.51841600  | -2.82279200 |
| H  | 6.04782000  | -1.01273000 | -3.07843600 |
| H  | 5.27329800  | 0.33883000  | -2.22129500 |
| C  | 8.08158500  | -1.35050600 | -1.32216100 |
| H  | 8.44617900  | -1.75323500 | -0.37556400 |
| H  | 7.95855000  | -2.15729500 | -2.04656200 |
| H  | 8.78154700  | -0.60627900 | -1.70671800 |
| C  | 5.78247700  | -1.71328300 | -0.53083100 |
| H  | 6.16840500  | -2.06818600 | 0.42623000  |
| H  | 4.81482800  | -1.23559500 | -0.39723800 |
| H  | 5.68643500  | -2.53696700 | -1.23854500 |
| C  | 6.90237600  | 0.43486300  | -0.11069300 |
| H  | 7.56186400  | 1.18723600  | -0.54697800 |
| H  | 5.91982300  | 0.85969500  | 0.09495400  |
| H  | 7.33188400  | 0.03817600  | 0.81091700  |
| P  | -0.05867500 | -0.19017300 | -0.14077500 |
| Ta | -0.51259800 | -2.02066900 | 2.52375900  |
| Ta | 0.32027800  | 0.09327100  | 3.82624700  |

Four possible adsorption configurations of N<sub>2</sub> on [N(CH<sub>3</sub>)<sub>4</sub><sup>+</sup>]<sub>3</sub>[Ta<sup>II</sup><sub>2</sub>/POM]

Bridge-on configuration

Atomic

Coordinates (Angstroms)

|   | X           | Y           | Z           |
|---|-------------|-------------|-------------|
| O | -0.83703400 | -0.93349900 | 0.96753300  |
| O | -0.96786700 | 0.59519000  | -1.06766400 |
| O | 0.75657100  | -1.28516800 | -0.96112400 |
| O | 3.10343900  | -2.16378400 | -1.67346200 |
| W | 2.24125300  | -0.85617000 | -2.88490800 |
| O | 2.92106900  | 0.52537100  | -1.80001200 |
| W | 2.65344700  | 2.23607100  | -0.82302600 |
| O | 1.20225800  | 2.47527500  | -2.06635000 |
| W | -0.21022500 | 1.89118300  | -3.17640100 |
| O | 0.86636000  | 0.28901700  | -3.48013900 |
| O | 1.01399000  | 0.76403900  | 0.50713900  |
| O | -1.74282000 | 0.73230500  | -3.61011600 |
| W | -2.78886400 | -0.31583000 | -2.45014000 |
| O | -3.43313800 | 1.25186400  | -1.58637200 |
| W | -2.38714100 | 2.56155900  | -0.55288700 |
| O | -1.45372000 | 2.94789500  | -2.18254900 |
| O | -1.55631700 | -1.79351500 | -2.75049500 |
| W | -0.31587000 | -3.12916200 | -2.25401400 |
| O | 1.11337700  | -3.87200100 | -1.13545700 |
| O | -0.79113900 | -4.47723600 | -3.17201400 |
| O | -1.47302900 | -3.31072300 | -0.64163700 |
| W | -2.69039600 | -2.56331600 | 0.55514000  |
| O | -1.70842700 | -3.07198700 | 2.09504700  |
| O | 1.89035700  | -0.97107600 | 3.10705300  |
| W | 3.07580700  | 0.12999900  | 1.96875200  |
| O | 3.59840300  | 1.35541700  | 0.67611700  |
| O | 1.05059500  | -2.36535000 | -3.30517900 |
| O | -4.14969600 | -0.74053100 | -3.39694600 |
| O | -3.17454300 | -1.31164400 | -0.80395800 |
| O | -4.03962200 | -3.62029800 | 0.55278100  |
| O | -3.45862500 | -1.10973400 | 1.79376800  |
| W | -2.65598700 | 0.40176900  | 2.48853600  |
| O | -1.51762500 | -0.71533100 | 3.61797600  |
| O | -3.78338800 | 1.02348100  | 3.60847100  |
| O | -2.93051400 | 1.47354700  | 1.00857300  |
| O | -0.81952900 | 1.44906300  | 2.79373200  |
| W | 0.47102600  | 2.74013400  | 1.81254000  |
| O | 1.70485200  | 1.44075800  | 2.88290900  |
| O | 1.17583400  | -2.93826500 | 1.40044600  |
| O | -3.40669900 | 3.92959700  | -0.43169700 |
| O | -0.92488700 | 3.05493200  | 0.55062600  |

|   |             |             |             |
|---|-------------|-------------|-------------|
| O | 0.00154100  | 2.81758300  | -4.58752900 |
| O | 3.35120600  | -0.88819800 | -4.17966300 |
| O | 3.21497000  | -1.36177500 | 0.86435400  |
| O | 0.42211400  | 4.16200500  | 2.76044900  |
| O | 1.80932100  | 3.24988300  | 0.54752200  |
| O | 3.84814900  | 3.29750400  | -1.41909000 |
| O | 4.50699300  | 0.09287000  | 2.90892900  |
| O | 3.53022000  | -4.13078500 | 0.28989500  |
| W | 2.37836000  | -2.93391200 | -0.10502100 |
| N | -6.92538000 | -1.08033400 | -0.22626700 |
| N | 0.01394100  | 6.68828600  | -0.37471200 |
| N | 6.88840300  | -1.08988700 | -0.40684100 |
| C | -6.39785300 | -1.99660100 | -1.30740700 |
| H | -7.09385400 | -2.83056300 | -1.41608800 |
| H | -6.31054200 | -1.43457400 | -2.23761600 |
| H | -5.41630300 | -2.36044700 | -1.01018000 |
| C | -6.91805600 | -1.80559400 | 1.09552500  |
| H | -7.31841500 | -1.13759600 | 1.86032700  |
| H | -7.54005700 | -2.69817000 | 1.00655300  |
| H | -5.89357300 | -2.08625900 | 1.33843700  |
| C | -6.05069900 | 0.14915300  | -0.12551400 |
| H | -6.05431200 | 0.66355800  | -1.08623900 |
| H | -6.45270500 | 0.79250000  | 0.65938500  |
| H | -5.03514700 | -0.15682300 | 0.11521400  |
| C | -8.32515300 | -0.66595300 | -0.56793200 |
| H | -8.95661500 | -1.55457500 | -0.62485300 |
| H | -8.69568100 | 0.00738600  | 0.20709500  |
| H | -8.31443900 | -0.15452600 | -1.53185700 |
| C | -1.17066200 | 6.37237200  | 0.50936000  |
| H | -0.94565800 | 5.48305200  | 1.09549500  |
| H | -1.34256200 | 7.22576300  | 1.16829100  |
| H | -2.04242700 | 6.18356600  | -0.11833900 |
| C | -0.23047200 | 7.98476800  | -1.08852100 |
| H | -0.34291800 | 8.78260100  | -0.35207500 |
| H | 0.61777500  | 8.19470800  | -1.74231400 |
| H | -1.14195000 | 7.89174100  | -1.68123800 |
| C | 1.25644100  | 6.79726300  | 0.47234100  |
| H | 1.43314600  | 5.84006800  | 0.96322300  |
| H | 2.09805600  | 7.04661100  | -0.17623600 |
| H | 1.10414700  | 7.58132700  | 1.21654600  |
| C | 0.20246100  | 5.58722900  | -1.39376000 |
| H | 1.06495500  | 5.83537900  | -2.01443800 |
| H | 0.37530200  | 4.64987200  | -0.87187400 |
| H | -0.69871700 | 5.50809000  | -2.00141200 |

|    |             |             |             |
|----|-------------|-------------|-------------|
| C  | 5.89137300  | -0.41850900 | -1.32418400 |
| H  | 6.33143200  | 0.50985000  | -1.69242400 |
| H  | 5.66647000  | -1.09142600 | -2.15149000 |
| H  | 4.97822000  | -0.21107400 | -0.77187100 |
| C  | 8.13547100  | -1.40733900 | -1.17742800 |
| H  | 8.85279900  | -1.89237900 | -0.51282600 |
| H  | 7.87849200  | -2.07519900 | -2.00115600 |
| H  | 8.55549000  | -0.47958600 | -1.56989700 |
| C  | 6.29136900  | -2.36586900 | 0.13701400  |
| H  | 7.03292200  | -2.85187600 | 0.77396000  |
| H  | 5.39620300  | -2.11800800 | 0.70571400  |
| H  | 6.01956600  | -3.01223900 | -0.69759500 |
| C  | 7.21873100  | -0.16717400 | 0.73763700  |
| H  | 7.62138700  | 0.76191700  | 0.33059900  |
| H  | 6.31284300  | 0.03420600  | 1.31133600  |
| H  | 7.96070300  | -0.65358300 | 1.37402500  |
| P  | 0.00242200  | -0.19612600 | -0.16521100 |
| Ta | -0.06310800 | -2.11558400 | 2.59020900  |
| N  | 0.44406200  | -1.26286500 | 5.62348300  |
| N  | 0.29252300  | -2.00142300 | 4.70905900  |
| Ta | 0.35706500  | 0.09700900  | 3.78333700  |

#### Side-on configuration

| Atomic | Coordinates (Angstroms) |             |             |
|--------|-------------------------|-------------|-------------|
|        | X                       | Y           | Z           |
| O      | -0.91312000             | -1.04178800 | 0.77418200  |
| O      | -1.10195300             | 0.85529200  | -0.91540300 |
| O      | 0.62606100              | -1.00797100 | -1.23560200 |
| O      | 2.95997800              | -1.68762000 | -2.22727000 |
| W      | 1.98344700              | -0.16382700 | -3.12913100 |
| O      | 2.76825700              | 0.93987600  | -1.81951600 |
| W      | 2.55895000              | 2.37687100  | -0.48428700 |
| O      | 1.04414000              | 2.88987100  | -1.54729200 |
| W      | -0.46149400             | 2.56992400  | -2.65770400 |
| O      | 0.61549500              | 1.07598300  | -3.38521700 |
| O      | 0.94040300              | 0.74610900  | 0.54742500  |
| O      | -2.00317100             | 1.51240600  | -3.29063600 |
| W      | -2.99028500             | 0.25939500  | -2.29682800 |
| O      | -3.58224600             | 1.57323200  | -1.08540700 |
| W      | -2.43700800             | 2.60618300  | 0.17958100  |
| O      | -1.62201300             | 3.37730100  | -1.39858900 |
| O      | -1.77106600             | -1.14297800 | -2.96189500 |

|   |             |             |             |
|---|-------------|-------------|-------------|
| W | -0.52882000 | -2.53722800 | -2.79030400 |
| O | 0.98360500  | -3.48995300 | -1.90025200 |
| O | -1.03573200 | -3.68362900 | -3.93739800 |
| O | -1.59239900 | -3.07103500 | -1.22273700 |
| W | -2.75633100 | -2.57218500 | 0.15759100  |
| O | -1.67603100 | -3.49245800 | 1.45429600  |
| O | 2.56569200  | -1.43630800 | 3.15410000  |
| W | 3.36652600  | -0.26558400 | 1.83932500  |
| O | 3.60029900  | 1.20240600  | 0.70580200  |
| O | 0.81236700  | -1.59543900 | -3.74582300 |
| O | -4.39784300 | 0.02319300  | -3.24222500 |
| O | -3.30066300 | -1.09346000 | -0.88984500 |
| O | -4.12257600 | -3.59772200 | 0.00012200  |
| O | -3.33888800 | -1.50481100 | 1.76048100  |
| W | -2.35714600 | -0.18921100 | 2.64986800  |
| O | -1.11523500 | -1.57459300 | 3.40755400  |
| O | -3.30374000 | 0.15958000  | 4.02446300  |
| O | -2.81187100 | 1.17924000  | 1.49648700  |
| O | -0.51365100 | 0.71637200  | 3.04275800  |
| W | 0.58904400  | 2.28356500  | 2.29157500  |
| O | 1.93336300  | 0.83557300  | 2.91243300  |
| O | 1.24862600  | -3.12500300 | 0.77001700  |
| O | -3.45043900 | 3.88377700  | 0.69028300  |
| O | -0.88833500 | 2.87149900  | 1.25864500  |
| O | -0.31801700 | 3.78510700  | -3.83995800 |
| O | 3.01986600  | 0.06121600  | -4.46545600 |
| O | 3.24948200  | -1.49450600 | 0.46525300  |
| O | 0.59896800  | 3.42200900  | 3.56927500  |
| O | 1.84546800  | 3.12232600  | 1.11045100  |
| O | 3.73026100  | 3.53564800  | -0.93153500 |
| O | 4.97498000  | -0.35002100 | 2.43223200  |
| O | 3.50053200  | -4.01712900 | -0.80746200 |
| W | 2.33849400  | -2.76791300 | -0.84940500 |
| N | -6.99697000 | -0.98576700 | -0.02009400 |
| N | 0.08936700  | 6.62357200  | 1.00537800  |
| N | 6.87376000  | -0.92998300 | -1.10847400 |
| C | -6.54360300 | -1.58139900 | -1.33447600 |
| H | -7.27853100 | -2.32879500 | -1.63994900 |
| H | -6.46131100 | -0.78753700 | -2.07724000 |
| H | -5.56982200 | -2.04563300 | -1.19031600 |
| C | -6.99618100 | -2.05839000 | 1.03887800  |
| H | -7.30502800 | -1.61341000 | 1.98646300  |
| H | -7.69633400 | -2.84140600 | 0.74131600  |
| H | -5.99042600 | -2.47127200 | 1.12087800  |



|    |             |             |             |
|----|-------------|-------------|-------------|
| C  | -6.05997200 | 0.12688900  | 0.39374400  |
| H  | -6.04519100 | 0.88671700  | -0.38718800 |
| H  | -6.42247600 | 0.54580600  | 1.33435500  |
| H  | -5.05876900 | -0.27886300 | 0.51905900  |
| C  | -8.38040100 | -0.42967800 | -0.17955000 |
| H  | -9.05782200 | -1.23471500 | -0.47017900 |
| H  | -8.70038600 | 0.00463500  | 0.76931400  |
| H  | -8.36107000 | 0.33905200  | -0.95380700 |
| C  | -1.03960300 | 6.12920400  | 1.87917700  |
| H  | -0.83575700 | 5.10140300  | 2.17378400  |
| H  | -1.09815300 | 6.77209200  | 2.75944100  |
| H  | -1.96891900 | 6.16646300  | 1.30958400  |
| C  | -0.14360100 | 8.06519200  | 0.66295300  |
| H  | -0.16724400 | 8.65131800  | 1.58352100  |
| H  | 0.66596300  | 8.41193000  | 0.01849800  |
| H  | -1.09740900 | 8.15158500  | 0.13982700  |
| C  | 1.39808500  | 6.47841700  | 1.74108200  |
| H  | 1.57769000  | 5.42096400  | 1.93635100  |
| H  | 2.19453400  | 6.87998500  | 1.11198100  |
| H  | 1.33563800  | 7.03516200  | 2.67789400  |
| C  | 0.14323600  | 5.80941100  | -0.26704100 |
| H  | 0.95820500  | 6.18780400  | -0.88636400 |
| H  | 0.32285500  | 4.76821400  | -0.01213400 |
| H  | -0.81035800 | 5.90126000  | -0.78657900 |
| C  | 5.79857300  | -0.08674400 | -1.75632300 |
| H  | 6.23856100  | 0.86897900  | -2.04637600 |
| H  | 5.41680000  | -0.61508400 | -2.62937400 |
| H  | 4.98861200  | 0.07157400  | -1.04784200 |
| C  | 7.98842400  | -1.14781100 | -2.08852700 |
| H  | 8.76025800  | -1.76210300 | -1.62106300 |
| H  | 7.58821400  | -1.65529400 | -2.96764100 |
| H  | 8.40204600  | -0.17947600 | -2.37551100 |
| C  | 6.29425500  | -2.26385800 | -0.70226200 |
| H  | 7.08713800  | -2.86202900 | -0.24907900 |
| H  | 5.48671400  | -2.09514200 | 0.00852900  |
| H  | 5.89663000  | -2.76129800 | -1.58683400 |
| C  | 7.40008400  | -0.22180500 | 0.11330000  |
| H  | 7.78079000  | 0.75553700  | -0.18878800 |
| H  | 6.59171500  | -0.10822100 | 0.83848600  |
| H  | 8.20377500  | -0.82274000 | 0.54368500  |
| P  | -0.10693900 | -0.10880400 | -0.20015000 |
| Ta | 0.01430400  | -2.86601900 | 2.12221700  |
| N  | 0.82072700  | -2.87047500 | 4.16483700  |
| N  | 0.67431600  | -4.01469700 | 3.83922800  |

|    |            |             |            |
|----|------------|-------------|------------|
| Ta | 0.79090100 | -0.77497500 | 3.62023500 |
|----|------------|-------------|------------|

End-on configuration

| Atomic | Coordinates (Angstroms) |             |             |
|--------|-------------------------|-------------|-------------|
|        | X                       | Y           | Z           |
| O      | -0.87147100             | -1.04146100 | 0.80883300  |
| O      | -1.11019400             | 0.80414000  | -0.92085600 |
| O      | 0.64633500              | -1.04806300 | -1.20362800 |
| O      | 2.98939000              | -1.76241700 | -2.18714900 |
| W      | 1.99035300              | -0.28528100 | -3.13052600 |
| O      | 2.77237600              | 0.86008900  | -1.84488600 |
| W      | 2.56582100              | 2.33780700  | -0.55992400 |
| O      | 1.05075100              | 2.82066600  | -1.64412900 |
| W      | -0.45661100             | 2.46473700  | -2.74649300 |
| O      | 0.62133900              | 0.95084000  | -3.41374600 |
| O      | 0.94839600              | 0.77044300  | 0.51795500  |
| O      | -1.99145600             | 1.37375700  | -3.32281600 |
| W      | -2.97732000             | 0.14555800  | -2.28583900 |
| O      | -3.57772900             | 1.51655500  | -1.13266800 |
| W      | -2.45053000             | 2.61655800  | 0.08244400  |
| O      | -1.62392800             | 3.31508600  | -1.52111400 |
| O      | -1.75145200             | -1.26558700 | -2.89675500 |
| W      | -0.50561200             | -2.65817400 | -2.66909200 |
| O      | 1.02430700              | -3.55447700 | -1.78255100 |
| O      | -1.01738100             | -3.84613400 | -3.77081100 |
| O      | -1.57323500             | -3.12489700 | -1.08331000 |
| W      | -2.75496100             | -2.59601400 | 0.28149900  |
| O      | -1.69319400             | -3.39695000 | 1.61841600  |
| O      | 2.47106400              | -1.34741800 | 3.22277100  |
| W      | 3.33633600              | -0.23222400 | 1.87261200  |
| O      | 3.59141200              | 1.20115700  | 0.69399700  |
| O      | 0.81744300              | -1.73158500 | -3.68294500 |
| O      | -4.38178000             | -0.12658300 | -3.22796400 |
| O      | -3.28784700             | -1.13938300 | -0.82675800 |
| O      | -4.11769300             | -3.63283100 | 0.14953300  |
| O      | -3.34079400             | -1.41858100 | 1.83587600  |
| W      | -2.39812400             | -0.06511800 | 2.68840800  |
| O      | -1.09728800             | -1.39850700 | 3.52924300  |
| O      | -3.35857900             | 0.32815800  | 4.03967700  |
| O      | -2.83628500             | 1.24491000  | 1.47049700  |
| O      | -0.56085200             | 0.87004500  | 2.99777000  |
| W      | 0.57430300              | 2.39021700  | 2.19995700  |

|   |             |             |             |
|---|-------------|-------------|-------------|
| O | 1.90180000  | 0.94133100  | 2.87451900  |
| O | 1.30994100  | -3.08216300 | 0.83844300  |
| O | -3.46957600 | 3.91319200  | 0.52860200  |
| O | -0.90242400 | 2.93645900  | 1.14128800  |
| O | -0.31468300 | 3.63401000  | -3.97442800 |
| O | 3.01717800  | -0.09151000 | -4.47902100 |
| O | 3.29696700  | -1.49857300 | 0.51946200  |
| O | 0.59111000  | 3.57803400  | 3.43157100  |
| O | 1.84729300  | 3.16423300  | 0.99050800  |
| O | 3.75209100  | 3.46583300  | -1.04577800 |
| O | 4.92473200  | -0.30432300 | 2.51658700  |
| O | 3.56578300  | -4.05802700 | -0.69770200 |
| W | 2.40615500  | -2.80724400 | -0.76311300 |
| N | -7.01470600 | -1.06978300 | -0.12010500 |
| N | 0.08400500  | 6.66068500  | 0.74722100  |
| N | 6.89145400  | -0.90369300 | -0.98515100 |
| C | -6.51264700 | -1.75063800 | -1.37442100 |
| H | -7.24115800 | -2.51148900 | -1.66174700 |
| H | -6.39078000 | -1.00601400 | -2.16138500 |
| H | -5.55052700 | -2.21200000 | -1.15918000 |
| C | -7.03969100 | -2.06662100 | 1.00967300  |
| H | -7.38789600 | -1.56238000 | 1.91299200  |
| H | -7.71938100 | -2.87835200 | 0.74307100  |
| H | -6.03269500 | -2.45916400 | 1.15390000  |
| C | -6.10270200 | 0.07990200  | 0.24586500  |
| H | -6.07867800 | 0.78855100  | -0.58142700 |
| H | -6.49565800 | 0.55235200  | 1.14808800  |
| H | -5.09877400 | -0.30124400 | 0.41938700  |
| C | -8.39657300 | -0.54106600 | -0.36314500 |
| H | -9.05804600 | -1.37197700 | -0.61503100 |
| H | -8.75021600 | -0.04151000 | 0.54069400  |
| H | -8.35808800 | 0.16938800  | -1.19056700 |
| C | -1.05324200 | 6.20943500  | 1.63351900  |
| H | -0.85404400 | 5.19604000  | 1.97707500  |
| H | -1.11737100 | 6.89253900  | 2.48260400  |
| H | -1.97799900 | 6.22221200  | 1.05545800  |
| C | -0.14018800 | 8.08677600  | 0.34056700  |
| H | -0.16518500 | 8.71334100  | 1.23414500  |
| H | 0.67384500  | 8.40076700  | -0.31497000 |
| H | -1.09123400 | 8.15481100  | -0.19025000 |
| C | 1.38655300  | 6.54265700  | 1.49861200  |
| H | 1.56052700  | 5.49411500  | 1.74104700  |
| H | 2.18924700  | 6.91380600  | 0.85887800  |
| H | 1.31903200  | 7.13944100  | 2.41010300  |

|    |             |             |             |
|----|-------------|-------------|-------------|
| C  | 0.14391100  | 5.79161100  | -0.48830400 |
| H  | 0.96817900  | 6.13672100  | -1.11468000 |
| H  | 0.31252700  | 4.76099500  | -0.18722800 |
| H  | -0.80372800 | 5.86873500  | -1.02106600 |
| C  | 5.78810500  | -0.13871500 | -1.68167800 |
| H  | 6.19047600  | 0.81952600  | -2.01451600 |
| H  | 5.43676500  | -0.72506000 | -2.53005800 |
| H  | 4.96624800  | 0.01925300  | -0.98717500 |
| C  | 8.02721000  | -1.11544300 | -1.94175000 |
| H  | 8.81855400  | -1.67491300 | -1.43920100 |
| H  | 7.66040100  | -1.67678300 | -2.80252700 |
| H  | 8.40271700  | -0.14333600 | -2.26604500 |
| C  | 6.36493000  | -2.24171200 | -0.52482000 |
| H  | 7.17605000  | -2.78275700 | -0.03365800 |
| H  | 5.53895400  | -2.07515800 | 0.16534900  |
| H  | 6.00332200  | -2.79661000 | -1.39062000 |
| C  | 7.36995400  | -0.11857300 | 0.20885800  |
| H  | 7.70781700  | 0.86145000  | -0.13270400 |
| H  | 6.54803000  | -0.01125900 | 0.91926900  |
| H  | 8.19552200  | -0.66120700 | 0.67411600  |
| P  | -0.08241500 | -0.11180000 | -0.20934500 |
| Ta | 0.03752600  | -2.56137400 | 2.08759800  |
| N  | 0.84783200  | -4.52465000 | 4.54817900  |
| N  | 0.55639600  | -3.86147100 | 3.68508900  |
| Ta | 0.73877500  | -0.57048400 | 3.67522600  |

### End-on configuration

| Atomic | Coordinates (Angstroms) |             |             |
|--------|-------------------------|-------------|-------------|
|        | X                       | Y           | Z           |
| O      | -0.84634500             | -0.95232900 | 0.89529700  |
| O      | -1.08300200             | 0.68107700  | -1.01899400 |
| O      | 0.66490100              | -1.19896300 | -1.09365800 |
| O      | 2.98318300              | -2.05560400 | -1.98013700 |
| W      | 2.01780200              | -0.66252300 | -3.07589200 |
| O      | 2.80225600              | 0.60466500  | -1.92080100 |
| W      | 2.61001700              | 2.22752800  | -0.79649000 |
| O      | 1.10845700              | 2.59815600  | -1.94227400 |
| W      | -0.39062700             | 2.14742800  | -3.01316200 |
| O      | 0.65768400              | 0.54317000  | -3.50092500 |
| O      | 0.98210000              | 0.78854900  | 0.42603100  |
| O      | -1.94328100             | 1.00892800  | -3.48253300 |
| W      | -2.95066100             | -0.08267000 | -2.33785900 |

|   |             |             |             |
|---|-------------|-------------|-------------|
| O | -3.53717500 | 1.39514700  | -1.32273600 |
| W | -2.40384100 | 2.61812100  | -0.22072500 |
| O | -1.55821700 | 3.12017900  | -1.88461200 |
| O | -1.74133900 | -1.57470000 | -2.75385700 |
| W | -0.50693200 | -2.94757400 | -2.37169200 |
| O | 0.99628800  | -3.75287800 | -1.37603700 |
| O | -1.03529400 | -4.24688200 | -3.33045300 |
| O | -1.59736400 | -3.21316200 | -0.73502000 |
| W | -2.82576000 | -2.53818600 | 0.51552300  |
| O | -1.77311400 | -3.21665800 | 1.97505000  |
| O | 2.44844200  | -1.06315400 | 3.28075000  |
| W | 3.32963300  | -0.07530400 | 1.89330200  |
| O | 3.61653500  | 1.21735400  | 0.55979300  |
| O | 0.82043900  | -2.15365000 | -3.47519100 |
| O | -4.35012400 | -0.43337400 | -3.26067800 |
| O | -3.31443400 | -1.22215400 | -0.75128400 |
| O | -4.19082100 | -3.57389700 | 0.47243400  |
| O | -3.39091300 | -1.18395000 | 1.89903100  |
| W | -2.44339600 | 0.23670700  | 2.66166800  |
| O | -1.23323100 | -1.04182100 | 3.56740600  |
| O | -3.42391300 | 0.78697000  | 3.94322500  |
| O | -2.83087500 | 1.41681100  | 1.29402300  |
| O | -0.57842200 | 1.16199500  | 2.89405100  |
| W | 0.60327200  | 2.56101100  | 1.95108800  |
| O | 1.91031400  | 1.20242900  | 2.77112100  |
| O | 1.26748700  | -3.05342200 | 1.18164700  |
| O | -3.39776000 | 3.97809800  | 0.06819500  |
| O | -0.85861400 | 3.00858100  | 0.82125600  |
| O | -0.22988300 | 3.17944200  | -4.35575900 |
| O | 3.05158800  | -0.62933600 | -4.43270000 |
| O | 3.27344200  | -1.48632000 | 0.66735600  |
| O | 0.62316800  | 3.88412900  | 3.03735400  |
| O | 1.88442200  | 3.19679000  | 0.66816800  |
| O | 3.80335800  | 3.29433400  | -1.39103100 |
| O | 4.91316500  | -0.08779800 | 2.55437800  |
| O | 3.54290000  | -4.16742300 | -0.24045600 |
| W | 2.39789600  | -2.91862800 | -0.43860100 |
| N | -7.03482400 | -0.93538500 | -0.07607900 |
| N | 0.13548800  | 6.67259900  | 0.13027400  |
| N | 6.88602900  | -1.02754000 | -0.88738800 |
| C | -6.53536400 | -1.75543700 | -1.24510600 |
| H | -7.27754500 | -2.52719900 | -1.45839700 |
| H | -6.39033100 | -1.10132300 | -2.10511300 |
| H | -5.58481400 | -2.21011900 | -0.97289000 |

|   |             |             |             |
|---|-------------|-------------|-------------|
| C | -7.09394000 | -1.80585700 | 1.15205500  |
| H | -7.45635100 | -1.20609800 | 1.98887000  |
| H | -7.77479700 | -2.63687700 | 0.95803600  |
| H | -6.09382000 | -2.18597500 | 1.36075200  |
| C | -6.10109000 | 0.22704600  | 0.17950000  |
| H | -6.04397000 | 0.83968100  | -0.71974200 |
| H | -6.49743100 | 0.80484700  | 1.01672200  |
| H | -5.10998000 | -0.15486000 | 0.41486200  |
| C | -8.40237000 | -0.40736900 | -0.39214100 |
| H | -9.07836900 | -1.24722300 | -0.56299000 |
| H | -8.75541400 | 0.19268900  | 0.44855900  |
| H | -8.33943300 | 0.20974100  | -1.28987700 |
| C | -1.00075800 | 6.32570300  | 1.06475100  |
| H | -0.78774900 | 5.37038800  | 1.54108100  |
| H | -1.07808100 | 7.11372200  | 1.81644100  |
| H | -1.92301500 | 6.24760600  | 0.48768300  |
| C | -0.08567000 | 8.04533100  | -0.43156500 |
| H | -0.09668600 | 8.76833500  | 0.38619200  |
| H | 0.72270400  | 8.27824100  | -1.12682600 |
| H | -1.04227400 | 8.05986700  | -0.95650900 |
| C | 1.43907100  | 6.63516500  | 0.88808300  |
| H | 1.60521100  | 5.62193500  | 1.25404700  |
| H | 2.24271800  | 6.92230100  | 0.20771900  |
| H | 1.37734000  | 7.33681300  | 1.72198700  |
| C | 0.19078400  | 5.67297000  | -1.00265200 |
| H | 1.02382300  | 5.93749800  | -1.65592100 |
| H | 0.34239800  | 4.67941400  | -0.58921500 |
| H | -0.75187800 | 5.70466700  | -1.54886500 |
| C | 5.78351500  | -0.38066800 | -1.69548500 |
| H | 6.16766600  | 0.54733600  | -2.12222800 |
| H | 5.47519800  | -1.06751500 | -2.48345800 |
| H | 4.93604700  | -0.17272400 | -1.04640200 |
| C | 8.05205200  | -1.32173800 | -1.78355800 |
| H | 8.84222700  | -1.79477500 | -1.19729600 |
| H | 7.72342800  | -1.99234900 | -2.57902700 |
| H | 8.41298100  | -0.38563400 | -2.21318800 |
| C | 6.37770600  | -2.31434100 | -0.28342200 |
| H | 7.18517900  | -2.76891500 | 0.29382300  |
| H | 5.52574900  | -2.08945300 | 0.35699100  |
| H | 6.05958700  | -2.97951300 | -1.08664500 |
| C | 7.31498600  | -0.09265600 | 0.21434400  |
| H | 7.63931400  | 0.84746300  | -0.23525400 |
| H | 6.47375500  | 0.07878700  | 0.88821100  |
| H | 8.14007400  | -0.55522100 | 0.75979600  |

|    |             |             |             |
|----|-------------|-------------|-------------|
| P  | -0.04602600 | -0.13982300 | -0.22785700 |
| Ta | -0.06767000 | -2.31459600 | 2.24098800  |
| N  | 0.73654500  | -2.18599700 | 6.40246600  |
| N  | 0.69918800  | -1.61497200 | 5.43758500  |
| Ta | 0.69000700  | -0.28362300 | 3.70202300  |
